# Supplementary material for: Eradication of planktonic bacteria by shape-tailored gold nanoparticle photothermia
Source: Royal Society of Chemistry journal article supplement (doi:10.1039/d4ma00821a), 2024-01-01
Supplement: d4ma00821a1.pdf [file d4ma00821a1.pdf]

Supplementary information

# Eradiation of planktonic bacteria by shape-tailored gold nanoparticle photothermia

Zhendong Peng,<sup>a</sup> Laurent Royon,<sup>b</sup> Yun Luo,<sup>c</sup> Philippe Decorse,<sup>a</sup> Sarra Gam Derouich,<sup>a</sup> Michaël Bosco,<sup>c</sup> Christine Gravier-Pelletier,<sup>c</sup> Romain Briandet,<sup>d</sup> John S. Lomas,<sup>a</sup> Claire Mangeney,<sup>c</sup> and Miryana Hémadi\*<sup>a</sup>

<sup>a</sup> Université Paris Cité, CNRS-UMR 7086, ITODYS, F-75013 Paris, France.

<sup>b</sup> Université Paris Cité, CNRS-UMR 8236, LIED, F-75013 Paris, France

<sup>c</sup> Université Paris Cité, CNRS-UMR 8601, LCBPT, F-75006 Paris, France

<sup>d</sup> Université Paris Saclay, INRAE, AgroParisTech, Micalis Institute, F-78350 Jouy-en-Josas, France

|                                                                                                                                                                                                                                                                                                                                              |    |
|----------------------------------------------------------------------------------------------------------------------------------------------------------------------------------------------------------------------------------------------------------------------------------------------------------------------------------------------|----|
| Figure S 1. TEM images of (a) AuNSP-citrate, (b) AuNRO-CTAB, (c) AuNFL-dopamine and (d) AuNST-PVP; insert figures are their size distributions.....                                                                                                                                                                                          | 3  |
| Figure S 2. Hydrodynamic diameters of AuNSP-citrate, AuNRO-CTAB, AuNFL-dopamine and AuNST-PVP, measured by DLS.....                                                                                                                                                                                                                          | 4  |
| Figure S 3. XPS high-resolution spectra of Au4f, C1s, O1s and N1s of (a) AuNSP-citrate, (b) AuNRO-CTAB, (c) AuNRO-citrate, (d) AuNFL-dopamine, and (e) AuNST-PVP. ....                                                                                                                                                                       | 5  |
| Figure S 4. Vis-NIR absorption spectra of AuNSP-citrate, AuNRO-CTAB, AuNFL-dopamine and AuNST-PVP (400~1100 nm) at Au <sup>0</sup> concentrations from 0.05 mM to 0.2 mM.....                                                                                                                                                                | 6  |
| Figure S 5. Photothermal heating of AuNSP-citrate, AuNRO-CTAB, AuNFL-dopamine and AuNST-PVP; [Au <sup>0</sup> ] = 0.2 mM, irradiation at 808 nm, power = 0.3 W.....                                                                                                                                                                          | 7  |
| Figure S 6. Photothermal stability of AuNSP-citrate, AuNRO-CTAB, AuNFL-dopamine and AuNST-PVP over 3 cycles; [Au <sup>0</sup> ] = 0.2 mM, irradiation at (a) 808 nm and (b) 1064 nm, power = 0.3 W. ....                                                                                                                                     | 8  |
| Figure S 7. Specific absorption rates (SAR) of AuNRO-CTAB, AuNFL-dopamine and AuNST-PVP; irradiation at 808 and 1064 nm, power = 0.3 and 0.5 W.....                                                                                                                                                                                          | 9  |
| Figure S 8. (a) Growth curve of <i>E. coli</i> . (b) Photothermal heating of mixtures of AuNSP-citrate, AuNRO-citrate, AuNFL-dopamine and AuNST-PVP with <i>E. coli</i> ; irradiation at 808 nm, power = 0.3 W. (c) Petri dishes with different concentrations of the mixtures, with and without photothermal heating. (d) % Mortality. .... | 10 |
| Table S 1. Comparative analysis of photothermal capacities of AuNFL-dopamine and AuNST-PVP; irradiation at 1064 nm, power = 0.3 W and 0.5 W.....                                                                                                                                                                                             | 11 |
| Table S 2. Bacterial population variation (in number and ΔLog) and mortality after incubation of <i>E. coli</i> with different AuNP suspensions (AuNSP-citrate, AuNRO-citrate, AuNFL-dopamine and AuNST-PVP), with and without photothermal heating.....                                                                                     | 12 |

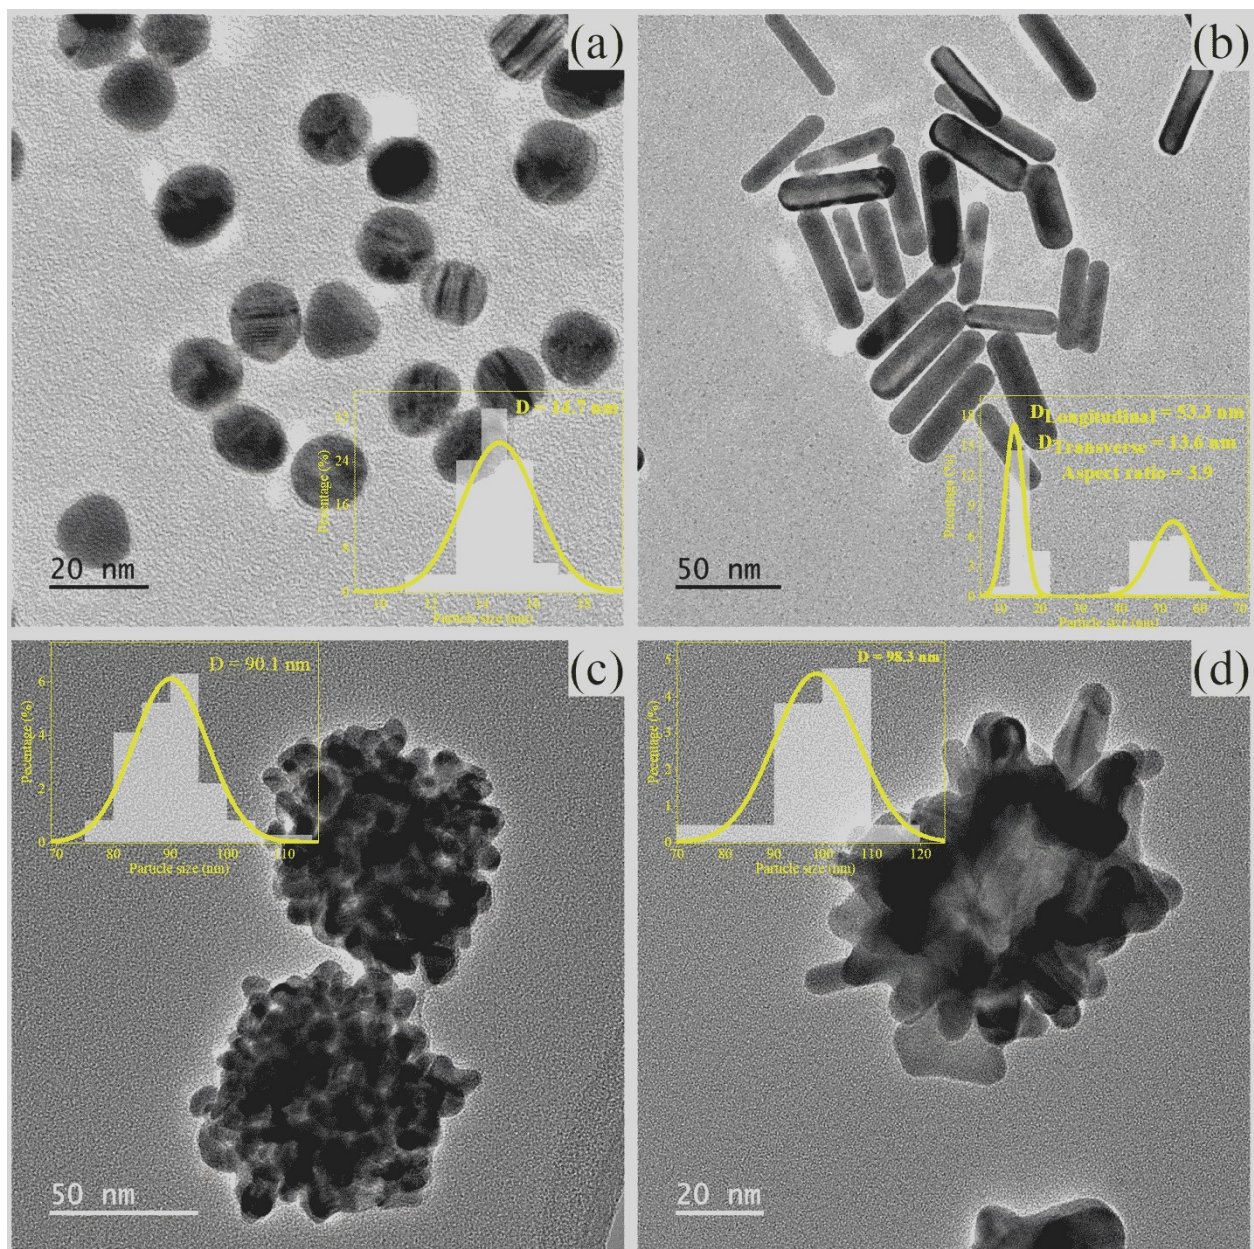

Figure S 1. TEM images of (a) AuNSP-citrate, (b) AuNRO-CTAB, (c) AuNFL-dopamine and (d) AuNST-PVP; insert figures are their size distributions.

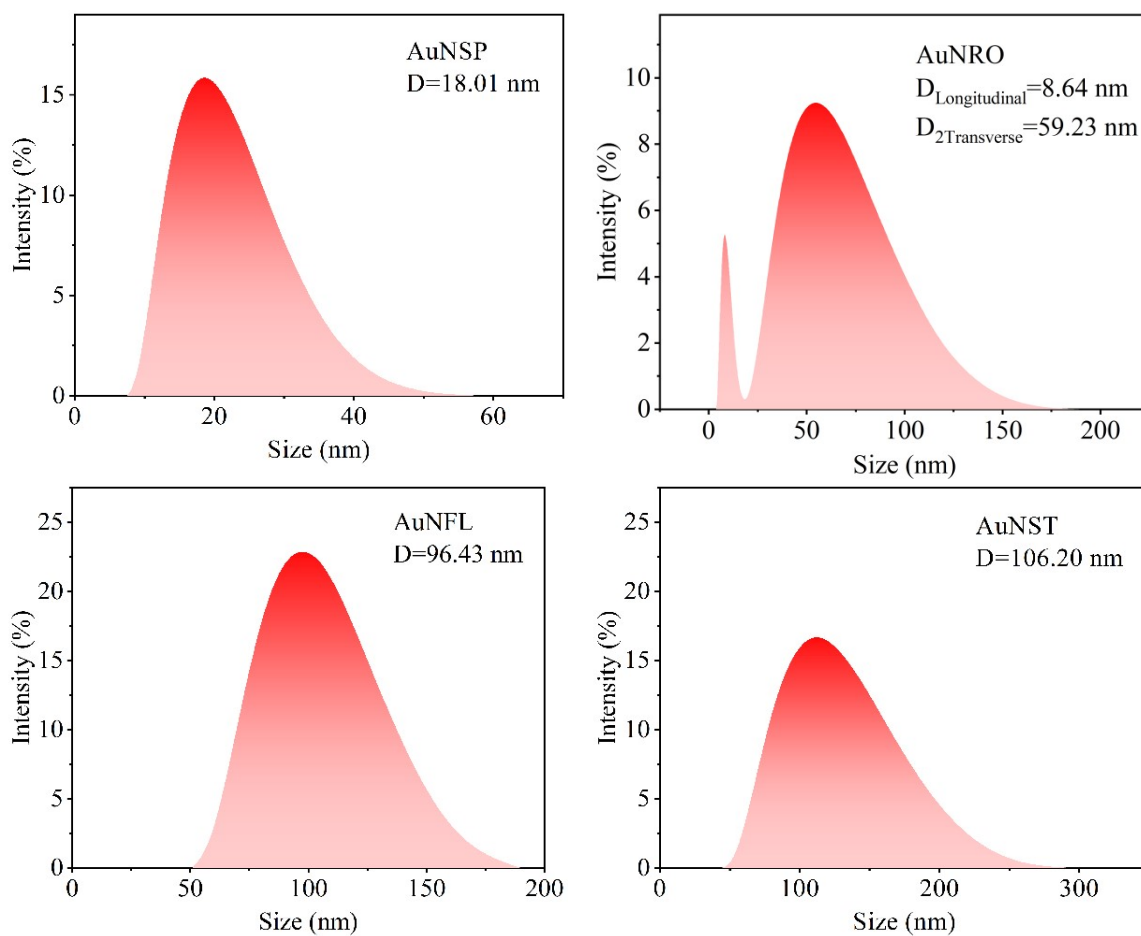

Figure S 2. Hydrodynamic diameters of AuNSP-citrate, AuNRO-CTAB, AuNFL-dopamine and AuNST-PVP, measured by DLS.

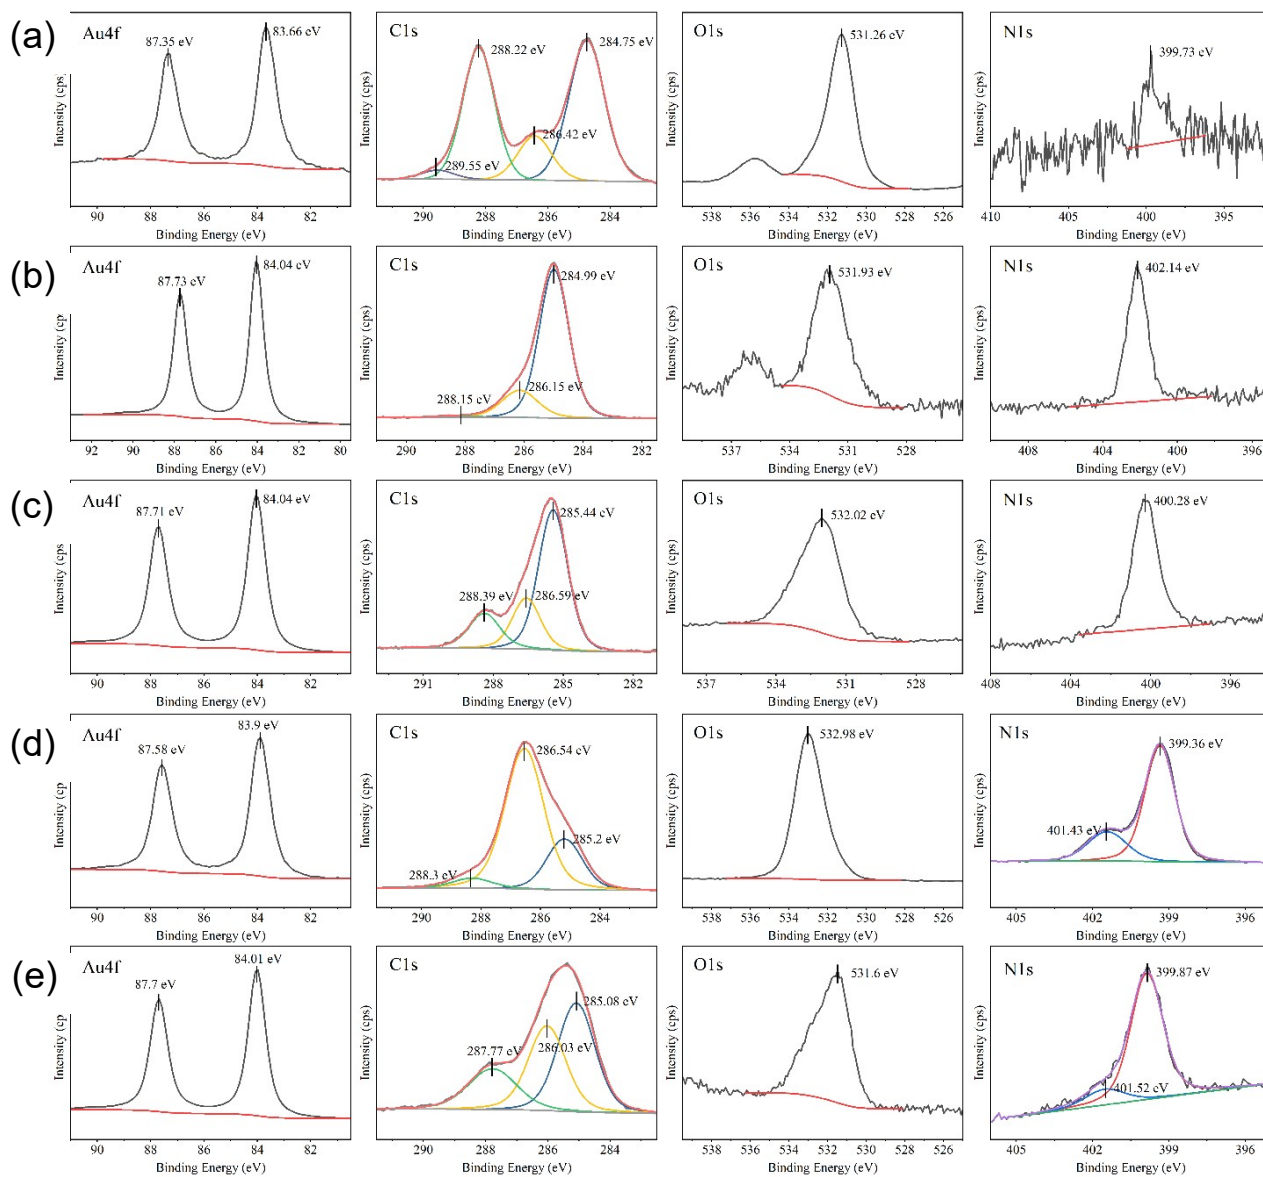

Figure S 3. XPS high-resolution spectra of Au4f, C1s, O1s and N1s of (a) AuNSP-citrate, (b) AuNRO-CTAB, (c) AuNRO-citrate, (d) AuNFL-dopamine, and (e) AuNST-PVP.

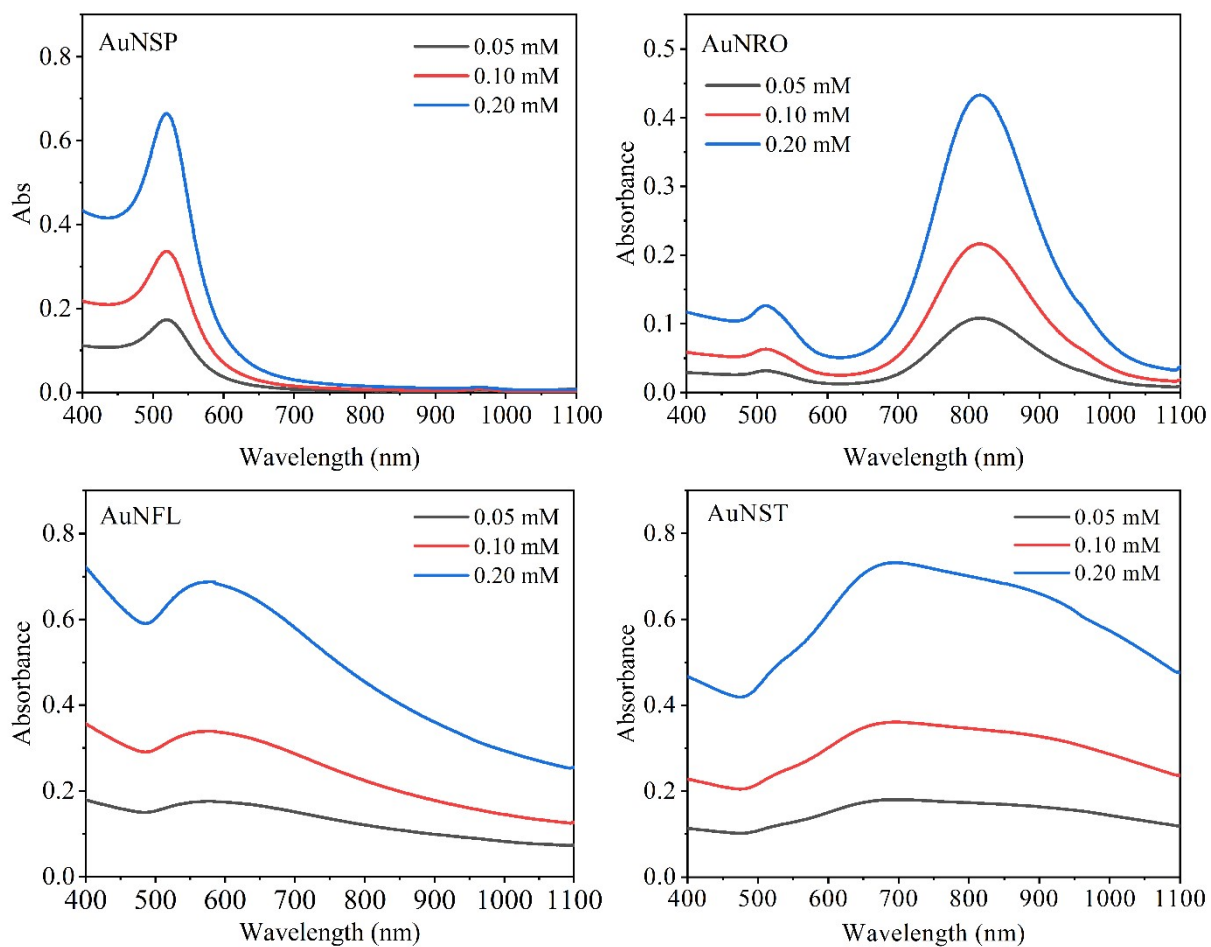

Figure S 4. Vis-NIR absorption spectra of AuNSP-citrate, AuNRO-CTAB, AuNFL-dopamine and AuNST-PVP (400~1100 nm); [Au<sup>0</sup>] from 0.05 mM to 0.2 mM.

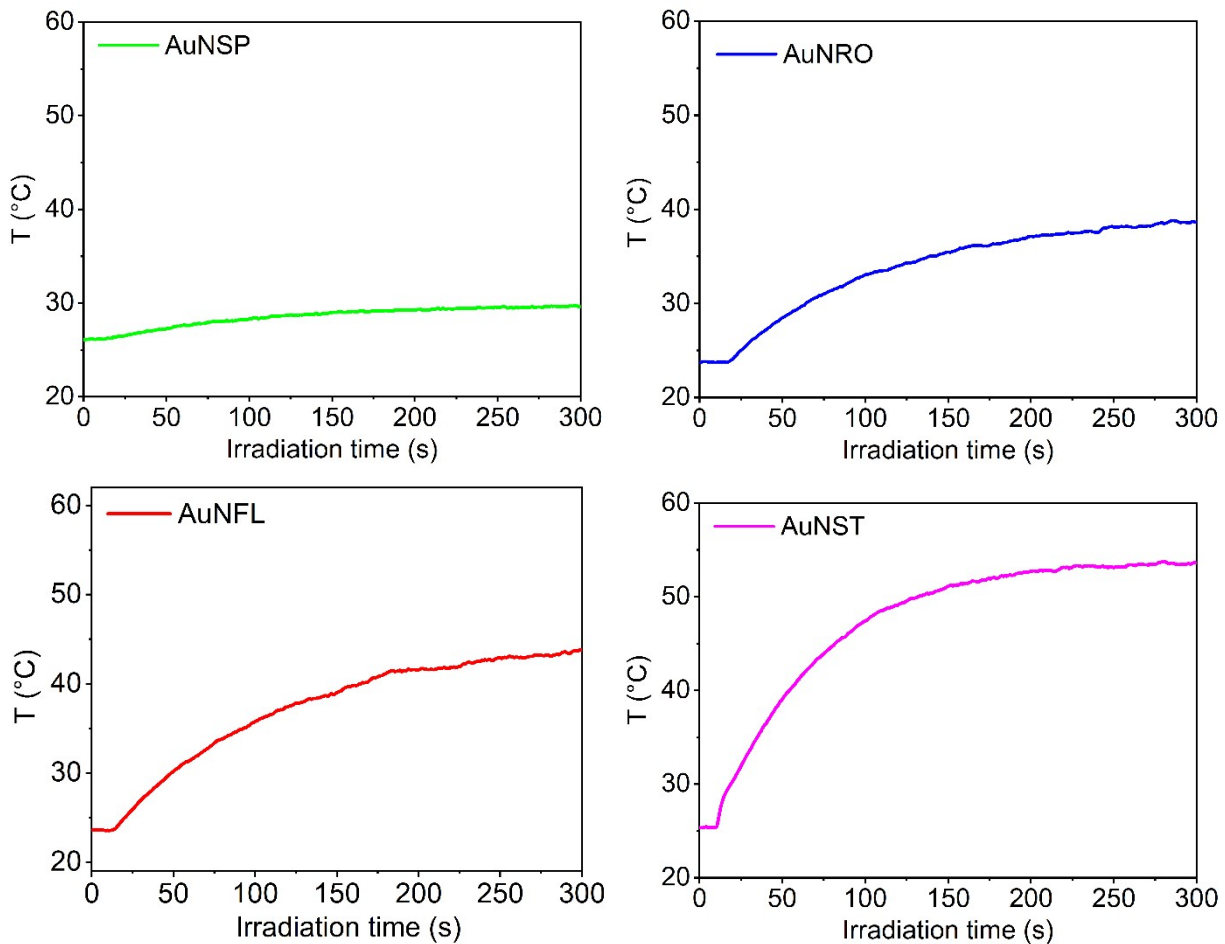

Figure S 5. Photothermal heating of AuNSP-citrate, AuNRO-CTAB, AuNFL-dopamine and AuNST-PVP;  $[Au^0] = 0.2 \text{ mM}$ , irradiation at 808 nm, power = 0.3 W.

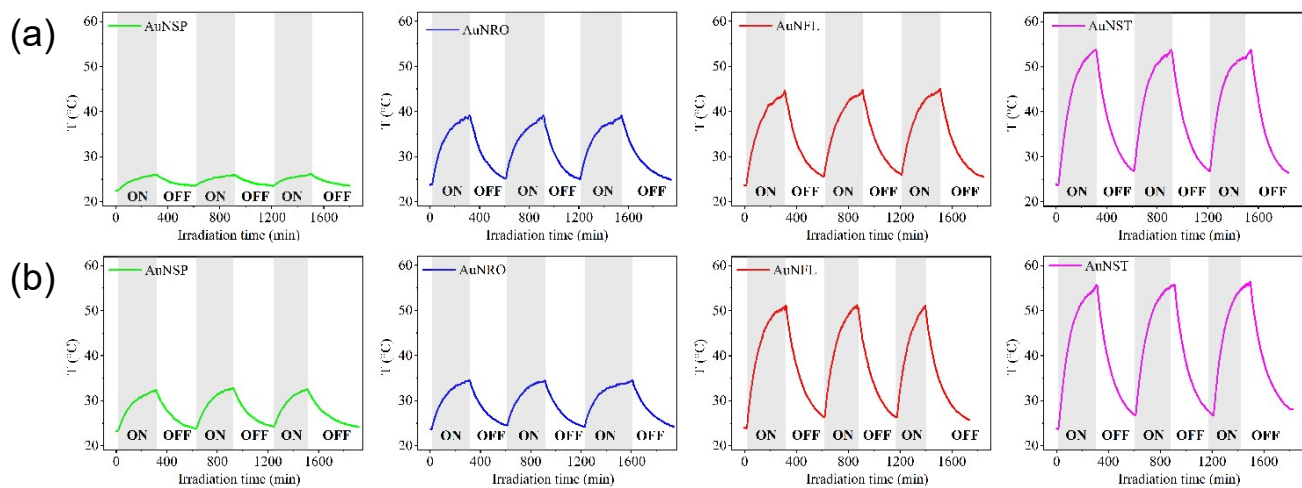

Figure S 6. Photothermal stability of AuNSP-citrate, AuNRO-CTAB, AuNFL-dopamine and AuNST-PVP over 3 cycles;  $[Au^0] = 0.2 \text{ mM}$ , irradiation at (a) 808 nm and (b) 1064 nm, power = 0.3 W.



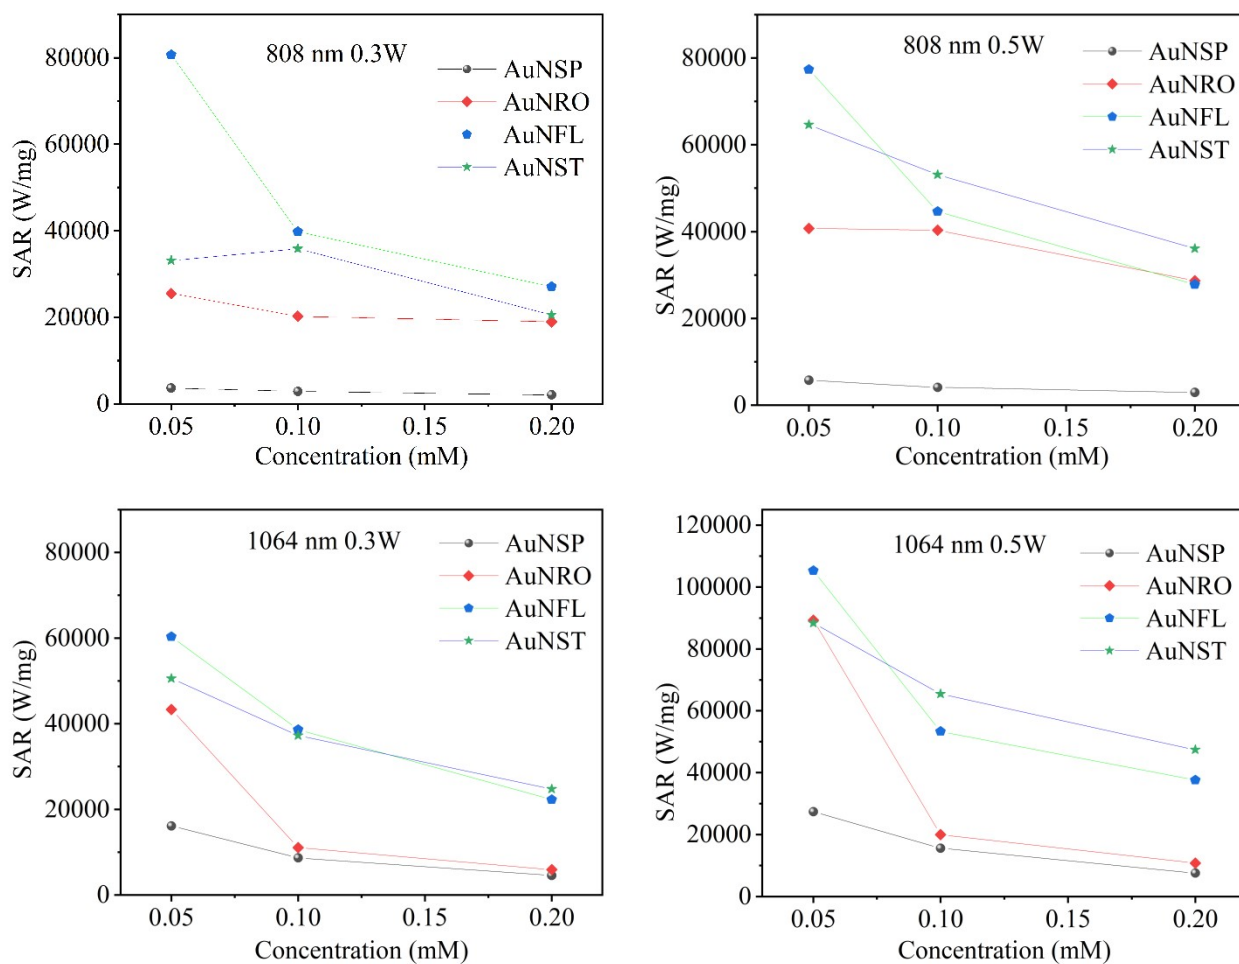

Figure S 7. Specific absorption rates (SAR) of AuNRO-CTAB, AuNFL-dopamine and AuNST-PVP; irradiation at 808 and 1064 nm, power = 0.3 and 0.5 W.

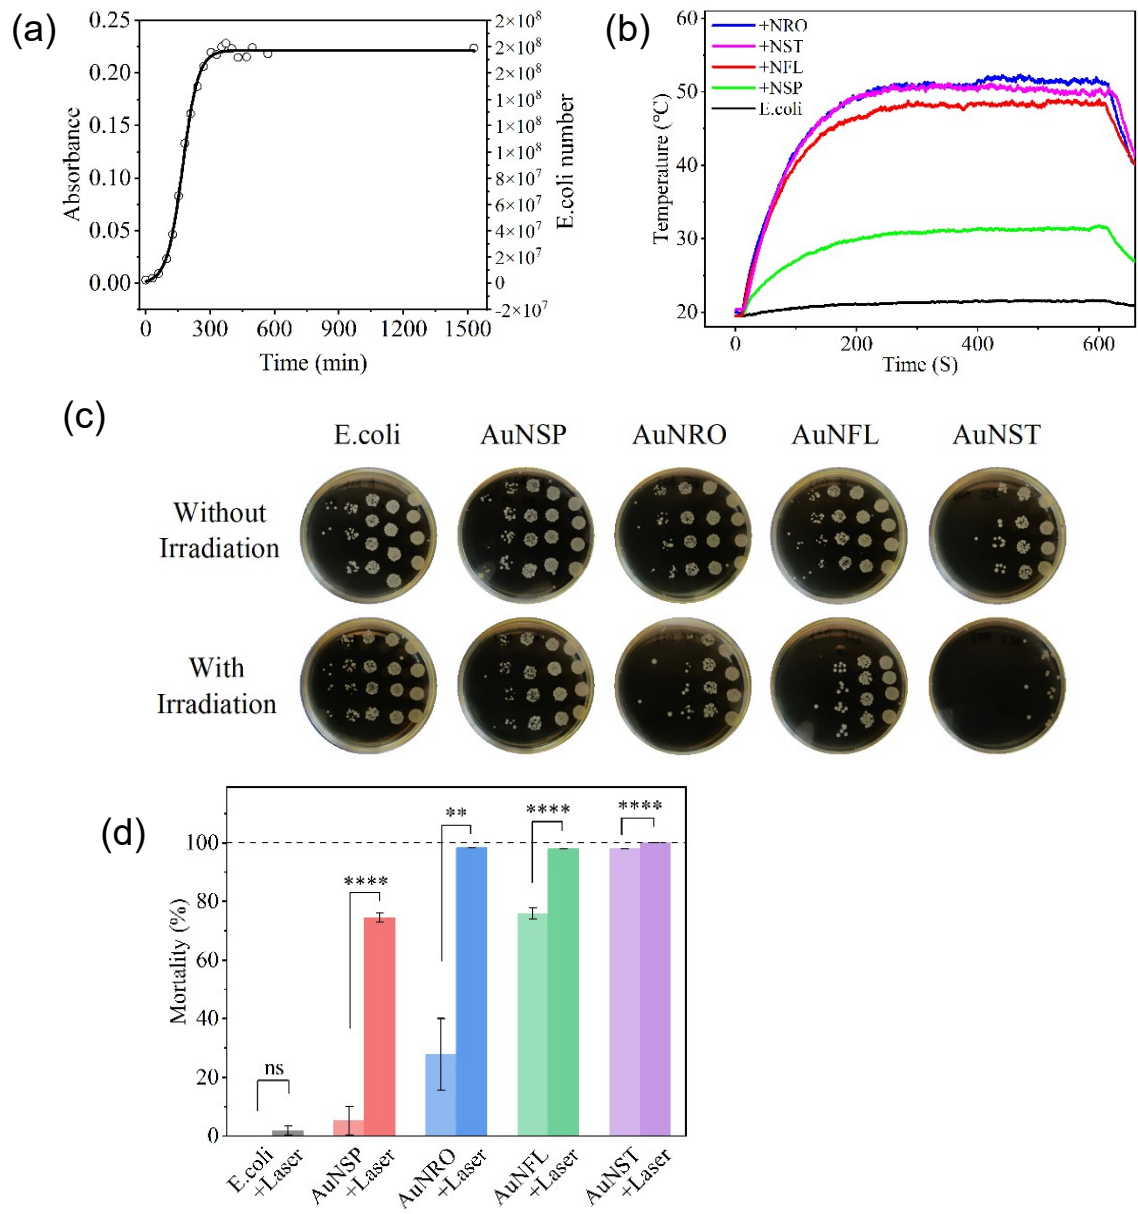

Figure S 8. (a) Growth curve of *E. coli*. (b) Photothermal heating of mixtures of AuNSP-citrate, AuNRO-citrate, AuNFL-dopamine and AuNST-PVP with *E. coli*; irradiation at 808 nm, power = 0.3 W. (c) Petri dishes with different concentrations of the mixtures, with and without photothermal heating. (d) % Mortality.

Table S 1. Comparative analysis of photothermal capacities of AuNFL-dopamine and AuNST-PVP at 1064 nm, power = 0.3 W and 0.5 W.

| <b>1064 nm</b> | <b>Power</b> | <b>[Au<sup>0</sup>]</b> | <b>ΔT</b> | <b>SAR</b>              | <b>τ<sub>h</sub></b> | <b>η<sub>h</sub></b> | <b>τ<sub>c</sub></b> | <b>η<sub>c</sub></b> | <b>η<sub>mean</sub></b> |
|----------------|--------------|-------------------------|-----------|-------------------------|----------------------|----------------------|----------------------|----------------------|-------------------------|
|                | <b>W</b>     | <b>mM</b>               | <b>°C</b> | <b>W g<sup>-1</sup></b> | <b>sec</b>           | <b>%</b>             | <b>sec</b>           | <b>%</b>             | <b>%</b>                |
| AuNFL          | 0.3          | 0.2                     | 21.4      | 22310                   | 125                  | 53                   | 98                   | 85                   | 69                      |
|                |              | 0.1                     | 21.1      | 38700                   | 132                  | 86                   | 93                   | -*                   | -*                      |
|                |              | 0.05                    | 16.5      | 60300                   | 143                  | -*                   | 113                  | -*                   | -*                      |
|                | 0.5          | 0.2                     | 34.5      | 37600                   | 104                  | 61                   | 91                   | 95                   | 78                      |
|                |              | 0.1                     | 28.4      | 53300                   | 111                  | 83                   | 92                   | -*                   | -*                      |
|                |              | 0.05                    | 27.3      | 105300                  | 152                  | 95                   | 106                  | -*                   | -*                      |
| AuNST          | 0.3          | 0.2                     | 27.2      | 24700                   | 108                  | 51                   | 101                  | 65                   | 58                      |
|                |              | 0.1                     | 20.2      | 37300                   | 109                  | 59                   | 107                  | 72                   | 65                      |
|                |              | 0.05                    | 14.0      | 50600                   | 127                  | 61                   | 127                  | 81                   | 71                      |
|                | 0.5          | 0.2                     | 40.8      | 475000                  | 103                  | 48                   | 82                   | 74                   | 61                      |
|                |              | 0.1                     | 31.0      | 65400                   | 109                  | 54                   | 94                   | 77                   | 65                      |
|                |              | 0.05                    | 23.8      | 88400                   | 108                  | 73                   | 116                  | 86                   | 79                      |

\* The photothermal conversion efficiency could not be calculated accurately.

Table S 2. Bacterial population variation (in number and  $\Delta\text{Log}$ ) and mortality after incubation of *E. coli* with different AuNP suspensions (AuNSP-citrate, AuNRO-citrate, AuNFL-dopamine and AuNST-PVP), with and without photothermal heating.

|                                  |                        | Blank                                 | AuNSP                                 | AuNRO                                 | AuNFL                                 | AuNST                                 |
|----------------------------------|------------------------|---------------------------------------|---------------------------------------|---------------------------------------|---------------------------------------|---------------------------------------|
| E.coli<br>number<br>(CFU/mL)     | Without<br>irradiation | 3.53E+07<br>$\pm 2.67\text{E}+0$<br>6 | 3.35E+07<br>$\pm 1.71\text{E}+0$<br>6 | 2.55E+07<br>$\pm 4.35\text{E}+0$<br>6 | 8.53E+06<br>$\pm 6.96\text{E}+0$<br>5 | 6.80E+05<br>$\pm 2.45\text{E}+0$<br>4 |
|                                  | With<br>irradiation    | 3.47E+07<br>$\pm 5.44\text{E}+0$<br>5 | 9.00E+06<br>$\pm 5.34\text{E}+0$<br>5 | 5.95E+05<br>$\pm 3.70\text{E}+0$<br>4 | 6.85E+05<br>$\pm 2.28\text{E}+0$<br>4 | 1.00E+04<br>$\pm 1.58\text{E}+0$<br>3 |
| $\Delta\text{Log}^*$<br>(CFU/mL) | Without<br>irradiation | -                                     | -0.02                                 | -0.14                                 | -0.62                                 | -1.72                                 |
|                                  | With<br>irradiation    | -0.02                                 | -0.59                                 | -1.77                                 | -1.71                                 | -3.55                                 |
| Mortality<br>(%)                 | Without<br>irradiation | -                                     | 5.2 $\pm$ 4.8                         | 27.8 $\pm$ 12.3                       | 75.9 $\pm$ 2.0                        | 98.1 $\pm$ 0.1                        |
|                                  | With<br>irradiation    | 1.9 $\pm$ 1.5                         | 74.5 $\pm$ 1.5                        | 98.3 $\pm$ 0.1                        | 98.1 $\pm$ 0.1                        | 100 $\pm$ 0.0                         |

\* 1-log represents 90% reduction in *E. coli* numbers; 2-log represents 99% reduction; 3-log represents 99.9% reduction; 4-log represents 99.99% reduction.
